# Supplementary material for: Analyzing Citramalic Acid Enantiomers in Apples and Commercial Fruit Juice by Liquid Chromatography–Tandem Mass Spectrometry with Pre-Column Derivatization
Source: MDPI journal article supplement (doi:10.3390/molecules28041556), 2023-02-06
Supplement: s1 [file s1]

*Supporting information*

**Analyzing citramalic acid enantiomers in apple and commercial fruit juice  
by liquid chromatography–tandem mass spectrometry with pre-column  
derivatization**

Maho Umino, Mayu Onozato, Tatsuya Sakamoto, Mikoto Koishi, Takeshi Fukushima\*

*Department of Analytical Chemistry, Faculty of Pharmaceutical Sciences, Toho University*

*2-2-1 Miyama, Funabashi-shi, Chiba 274-8510, Japan*

\*Takeshi Fukushima (Corresponding author): t-fukushima@phar.toho-u.ac.jp

Faculty of Pharmaceutical Sciences, Toho University,

2-2-1 Miyama, Funabashi-shi, Chiba 274-8510, Japan

Phone number/Fax: 81-47-472-1504

## Contents

Scheme S1. Biosynthetic pathways of (a) *R*- and (b) *S*-CMA. . . . . Page 3

Figure S1. MS/MS spectra of *R*-CMA detected in samples prepared from apple peel, fruit, and juice. . . . . Page 4

Figure S2. MRM chromatogram of the internal standard used in the present study. . . . . Page 5

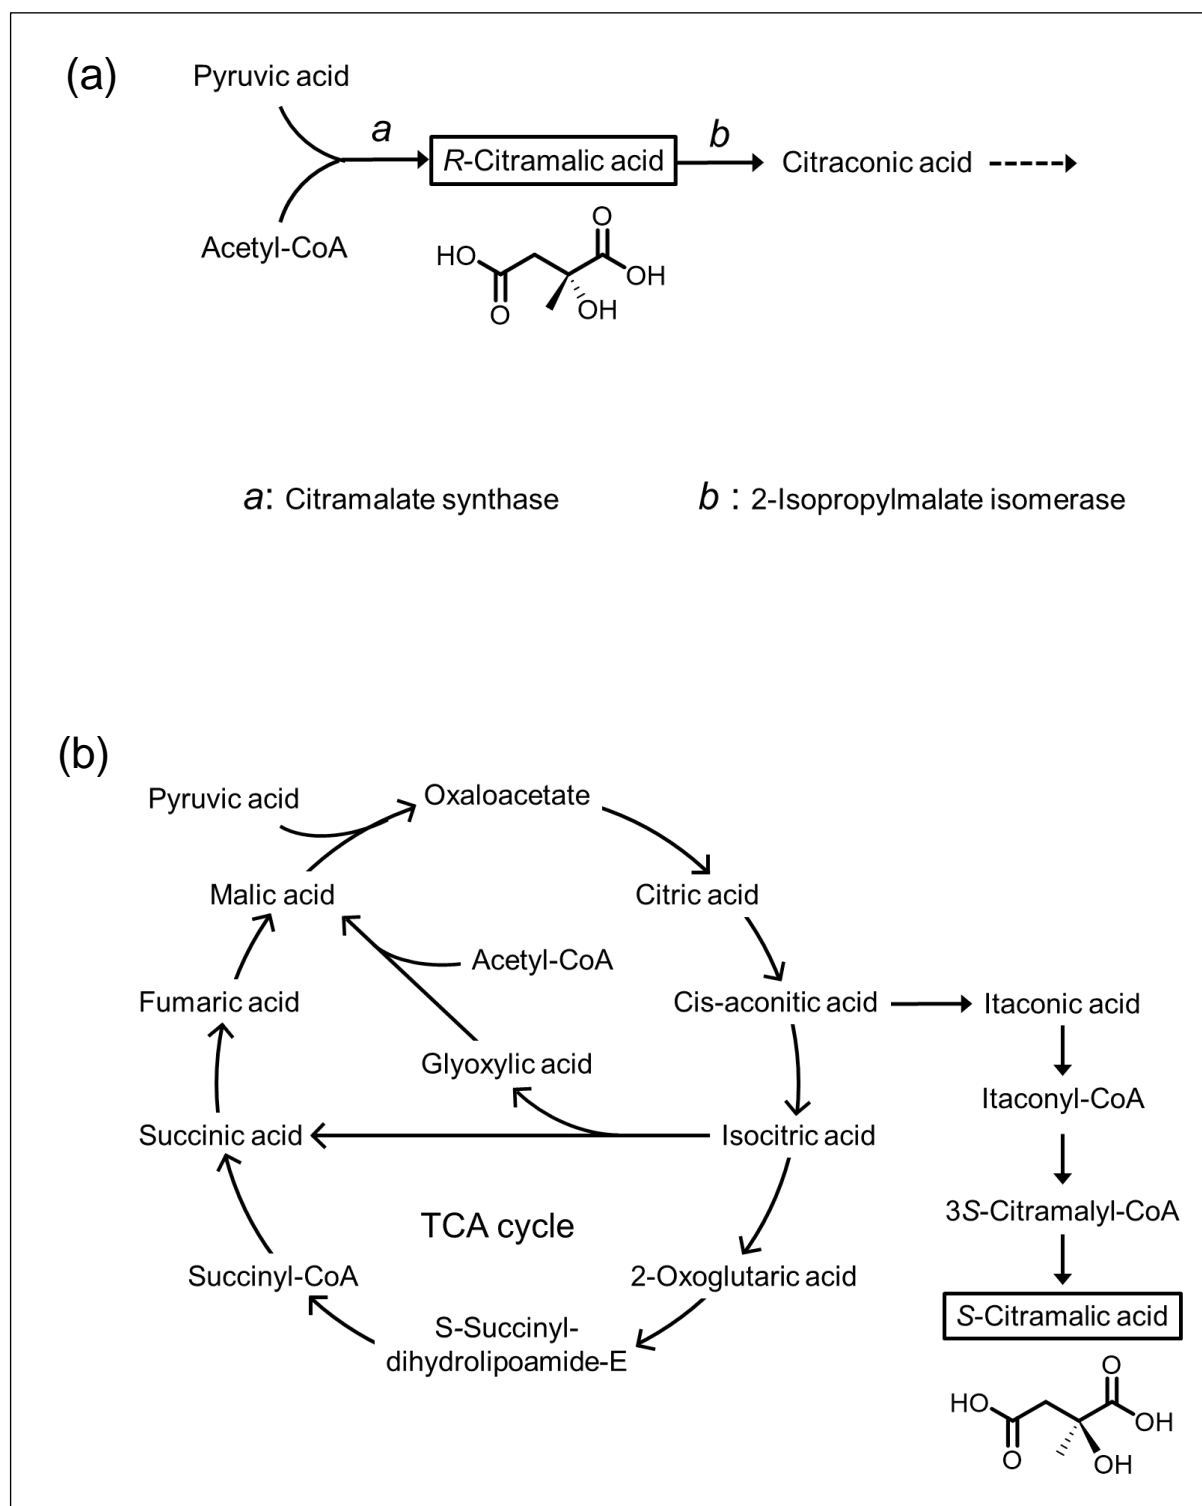

Scheme S1. Biosynthetic pathways for (a) *R*- and (b) *S*-CMA.

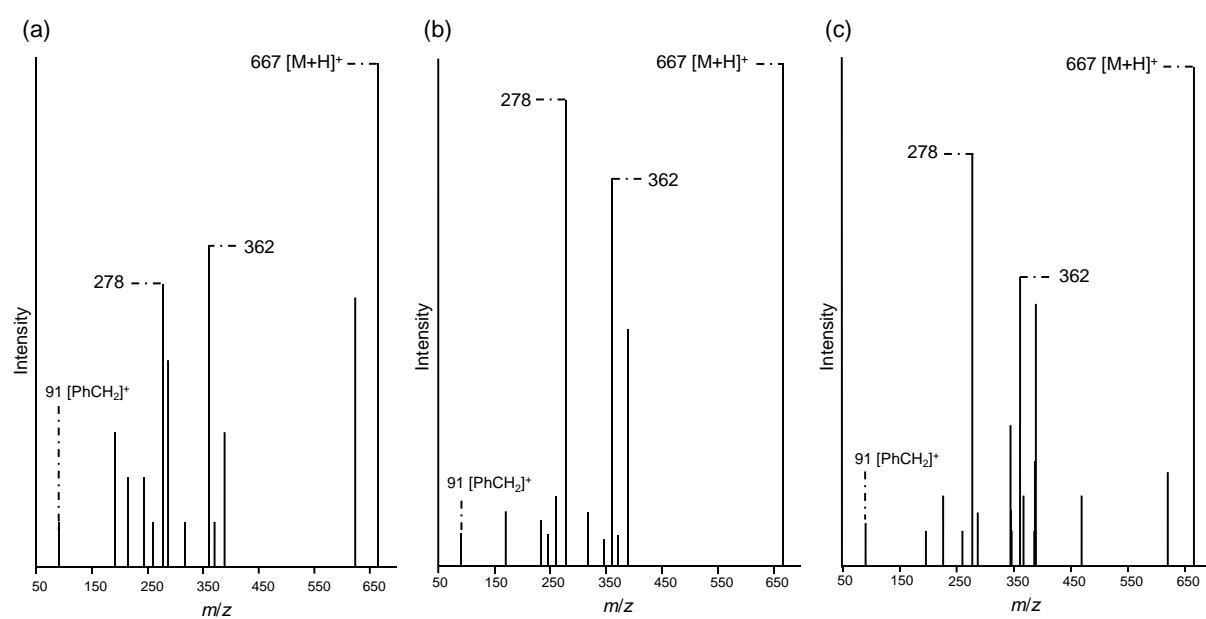

Figure S1. MS/MS spectra of *R*-CMA detected in the samples prepared from apple peel (a), fruit (b), and juice (c).

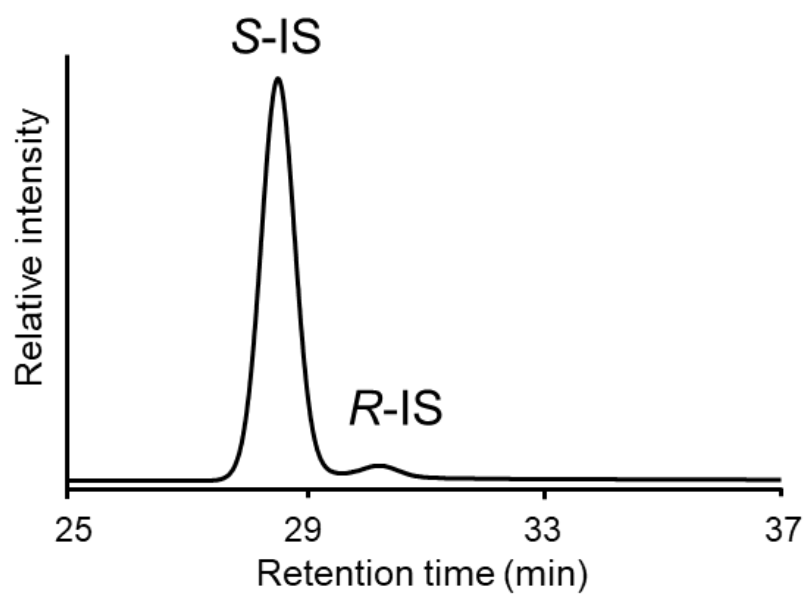

Figure S2. MRM chromatogram of the internal standard (10  $\mu$ M sodium D-lactate ( $^{13}\text{C}_3$ , 98%) and 1.0 mM L-lactate -3,3,3- $d_3$ ) used in the present study.
